# Supplementary material for: Microelectrodes with gold nanoparticles and self-assembled monolayers for in vivo recording of striatal dopamine
Source: Royal Society of Chemistry journal article supplement (doi:10.1039/c2an16306c), 2012-01-01
Supplement: c2an16306c.pdf [file c2an16306c.pdf]

1           **Microelectrodes with gold nanoparticles and self-assembled**  
2           **monolayers for *in vivo* recording of striatal dopamine**

3

4

5           Tien-Chun Tsai<sup>a</sup>, Chun-Xian Guo<sup>b,c</sup>, Huan-Zhang Han<sup>a</sup>, Yu-Ting Li<sup>a</sup>,

6           Ying-Zu Huang<sup>d</sup>, Chang-Ming Li<sup>b,c</sup>, Jia-Jin Jason Chen<sup>a,e\*</sup>

7

8           <sup>a</sup> *Department of Biomedical Engineering, National Cheng Kung University, Tainan*

9           *701, Taiwan*

10          <sup>b</sup> *School of Chemical and Biomedical Engineering, Nanyang Technological*

11          *University, Singapore 637457, Singapore*

12          <sup>c</sup> *Center for Advanced Bionanosystems, Nanyang Technological University,*

13          *Singapore 637457, Singapore*

14          <sup>d</sup> *Department of Neurology, Chang Gung Memorial Hospital, Taoyuan 333, Taiwan*

15          <sup>e</sup> *Medical Device Innovation Center, National Cheng Kung University, Tainan 701,*

16          *Taiwan*

17

1

## Electronic Supplementary Information

2

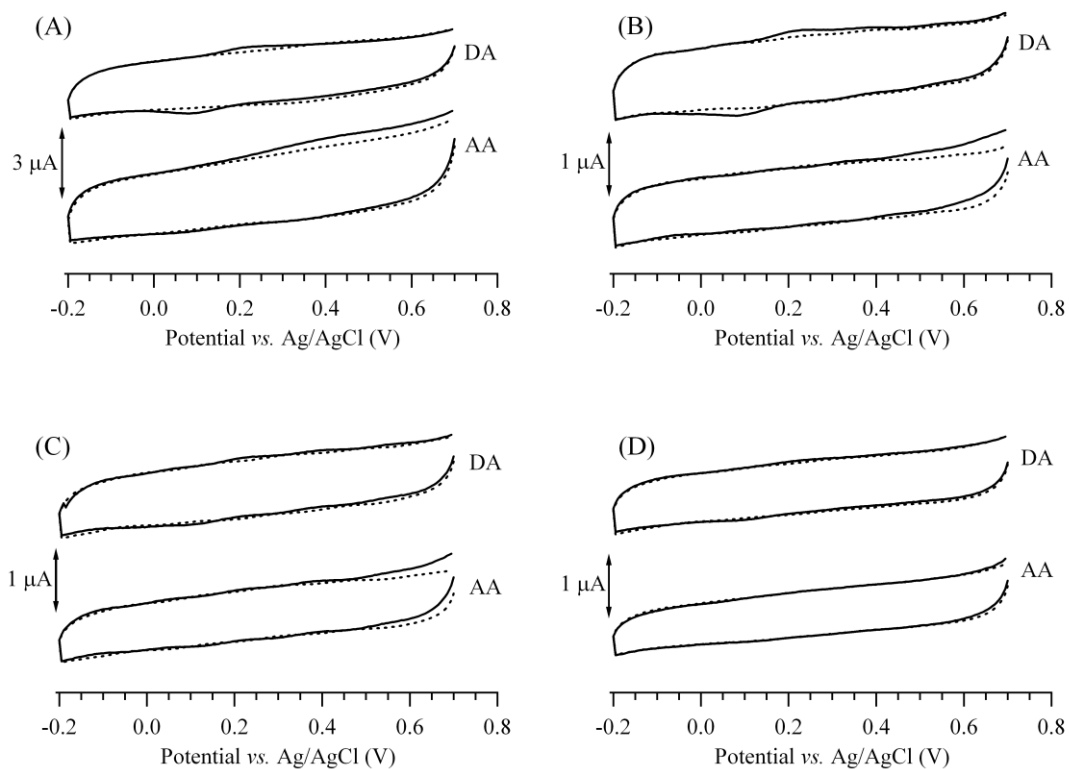

3

4

5 **Fig. S1** Cyclic voltammograms of 10  $\mu\text{M}$  DA and 1 mM AA obtained from (A)  
6 Au-NP, (B) Au-NP/MPA, (C) Au-NP/MOA and (D) Au-NP/MUA modified  
7 microelectrodes in 0.1 M PB solution (dotted line); scan rate: 10  $\text{V s}^{-1}$ .

8
